# Supplementary material
Source: PubMed Central journal article supplement (PMC4946960)
Supplement: NIHMS797774-supplement-01.pdf [file NIHMS797774-supplement-01.pdf]

## SUPPLEMENTAL MATERIAL

### Immune-mediated Reactions to Vancomycin: A Systematic Case Review

#### Supplementary eTable 1:

**Table 1.** Summary of identified immune-mediated HSRs reported from vancomycin

|                                                     | Total cases included | Source  |
|-----------------------------------------------------|----------------------|---------|
| Linear IgA bullous dermatosis                       | 34                   | [1-26]  |
| DRESS                                               | 16                   | [17-36] |
| IgE-mediated                                        | 7                    | [37-43] |
| Acute interstitial nephritis                        | 8                    | [44-51] |
| Stevens-Johnson syndrome/toxic epidermal necrolysis | 6                    | [52-57] |

*Abbreviations: HSR, hypersensitivity reaction*

#### Supplementary references

1. Kakar R, Paugh H, Jaworsky C. Linear IgA Bullous Disease Presenting as Toxic Epidermal Necrolysis: A Case Report and Review of the Literature. *Dermatology*. 2013;227(3):209-213. doi:10.1159/000353584.
2. Selvaraj PK1 KF. Linear IgA bullous dermatosis: a rare side effect of vancomycin. *Ann saudi Med*. 2013;33(4):397-399.
3. Jawitz R, Kent K SB. A vesiculobullous eruption in a hospitalized patient. Diagnosis: Drug-induced linear IgA bullous dermatosis (LAD) with eosinophils. *Arch Dermatol*. 2011;147(123).
4. McDonald HC, York NR, Pandya AG. Drug-induced linear IgA bullous dermatosis demonstrating the isomorphic phenomenon. *J Am Acad Dermatol*. 2010;62(5):897-898. doi:10.1016/j.jaad.2009.03.026.
5. Walsh S, Kerchner K SO. Localized Palmar Vancomycin-Induced Linear IgA Bullous Dermatitis Occurring at Supratherapeutic Levels. *JAMA Dermatology*. 2009;145(5):603-604.

6. Khan I, Hughes R, Curran S, Marren P. Drug-associated linear IgA disease mimicking toxic epidermal necrolysis. *Clin Exp Dermatol*. 2008;34(6):715-717. doi:10.1111/j.1365-2230.2008.03011.x.
7. Case of vancomycin-induced linear Immunoglobulin A bullous dermatosis. *Senanayake S, Hardman D, Mill A*. 2008;38(7):607-607. doi:10.1111/j.1445-5994.2008.01714.x.
8. Billet SE, Kortuem KR, Gibson LE. A Morbilliform Variant of Vancomycin-Induced Linear IgA Bullous Dermatitis. 2008;144(6):774-778.
9. Navi D1, Michael DJ FN. Drug-induced linear IgA bullous dermatosis. *Dermatol Online J*. 2006;8(12):12.
10. Waldman M a, Black DR, Callen JP. Vancomycin-induced linear IgA bullous disease presenting as toxic epidermal necrolysis. *Clin Exp Dermatol*. 2004;29(6):633-636. doi:10.1111/j.1365-2230.2004.01649.x.
11. Joshi S, Scott G, Looney RJ. A successful challenge in a patient with vancomycin-induced linear IgA dermatosis. *Ann Allergy, Asthma Immunol*. 2004;93(1):101-103. doi:10.1016/S1081-1206(10)61454-8.
12. Armstrong AW, Fazeli A, Yeh SW, Mackool BT, Liu V. Vancomycin-induced linear IgA disease manifesting as bullous erythema multiforme. *J Cutan Pathol*. 2004;31(5):393-397. doi:10.1111/j.0303-6987.2004.00190.x.
13. Dellavalle RP, Burch JM, Tayal S, Golitz LE, Fitzpatrick JE WP. Vancomycin-associated linear IgA bullous dermatosis mimicking toxic epidermal necrolysis. *J Am Acad Dermatol*. 2003;35(5):56-57.
14. Neugebauer BI, Negron G, Pelton S, Plunkett RW, Beutner EH, Magnussen R. Bullous Skin Disease : An Unusual Allergic Reaction to Vancomycin. :273-278.
15. Palmer R a., Ogg G, Allen J, et al. Vancomycin-induced linear IgA disease with autoantibodies to BP180 and LAD285. *Br J Dermatol*. 2001;145(5):816-820. doi:10.1046/j.1365-2133.2001.04492.x.
16. Klein PA, Jeffrey P. Drug-induced linear IgA bullous dermatosis after vancomycin discontinuance in a patient with renal insufficiency. *J Am Acad Dermatology*. 2000;42(2):316-323.
17. Mofid MZ1, Costarangos C, Bernstein B, Wong L, Munster A NH. Drug-induced linear immunoglobulin A bullous disease that clinically mimics toxic epidermal necrolysis. *J Burn care Rehabil*. 2000;21(3):246-247.
18. Danielsen A.G TK. Vancomycin-induced linear IgA bulluouous disease. *Br J Dermatol*. 1999;141:747-776.

19. Bernstein E SM. Linear IgA Bullous Dermatitis Associated with Vancomycin. *Ann Intern Med.* 1998;129(6):508-510.
20. Nousari H, Costarangos C AG. Vancomycin-Associated Linear IgA Bullous Dermatitis. *Ann Intern Med.* 1998;129(6):506-510.
21. Whitworth JM, Thomas I, Peltz SA, et al. Vancomycin-induced linear IgA bullous dermatosis ( LABD ). 1996:890-891.
22. Richards SS, Hall S, Yokel, Benjamin WE. A Bullous Eruption in an Elderly Woman. *Arch Dermatol.* 1995;131(12):1447-1448.
23. Geissmann C, Beylot-Barry M, Doutre MS BC. Drug-induced linear IgA bullous dermatosis. *J Am Acad Dermatology.* 1995;32(2):296.
24. Kuechle MK1, Stegemeir E, Maynard B, Gibson LE, Leiferman KM PM. Drug-induced linear IgA bullous dermatosis: report of six cases and review of the literature. *J Am Acad Dermatology.* 1994;30(2):187-192.
25. Carpenter S1, Berg D, Sidhu-Malik N, Hall RP 3rd RM. Vancomycin-associated linear IgA dermatosis. A report of three cases. *J Am Acad Dermatology.* 1992;26(1):45-48.
26. Baden LA, Apovian C, Imber MJ DJ. Vancomycin-induced linear IgA bullous dermatosis. *Arch Dermatol.* 1988;124(8):1186-1188.
27. Young S, Ojaimi S, Dunckley H, et al. Vancomycin-associated drug reaction with eosinophilia and systemic symptoms syndrome. *Intern Med J.* 2014;44(7):694-696. doi:10.1111/imj.12462.
28. Della-Torre E, Yacoub M-R, Pignatti P, et al. Optimal management of DRESS syndrome in course of infectious endocarditis. *Ann Allergy, Asthma Immunol.* 2013;110(4):303-305. doi:10.1016/j.anai.2013.01.006.
29. Blumenthal KG, Patil SU, Long A a. The importance of vancomycin in drug rash with eosinophilia and systemic symptoms (DRESS) syndrome. *Allergy Asthma Proc.* 2013;33(2):165-171. doi:10.2500/aap.2012.33.3498.
30. Dauby N, Fink W, Seyler L, Luce S, Nouwynck C, Tas S JF. Probable hypersensitivity reaction to vancomycin associating rash, fever and neutropenia. *Acta Clin Belg.* 2012;67(3):226-228.
31. O'Meara P, Borici-Mazi R, Morton a R, Ellis AK. DRESS with delayed onset acute interstitial nephritis and profound refractory eosinophilia secondary to Vancomycin. *Allergy Asthma Clin Immunol.* 2011;7(1):16. doi:10.1186/1710-1492-7-16.

32. Boet S, Noblet C, Haas-Hubscher C, Picard D, Musette P DB. Severe vancomycin-induced drug rash with eosinophilia and systemic symptoms syndrome imitating septic shock. *Eur J Anaesthesiol*. 2009;26(9):788-790. doi:10.1097/EJA.0b013e32831ac2d6.
33. Vauthey L, Uçkay I, Abrassart S, et al. Vancomycin-induced DRESS syndrome in a female patient. *Pharmacology*. 2008;82(2):138-141. doi:10.1159/000142729.
34. Tamagawa-Mineoka R, Katoh N, Nara T, Nishimura Y, Yamamoto S, Kishimoto S. DRESS syndrome caused by teicoplanin and vancomycin, associated with reactivation of human herpesvirus-6. *Int J Dermatol*. 2007;46(6):654-655. doi:10.1111/j.1365-4632.2007.03255.x.
35. Zuliani E, Zwahlen H, Gilliet F, Marone C. Vancomycin-induced hypersensitivity reaction with acute renal failure: resolution following cyclosporine treatment. *Clin Nephrol*. 2005;64(08):155-158. doi:10.5414/CNP64155.
36. Marik PE, Ferris N, Pharm D. Delayed Hypersensitivity Reaction to Vancomycin.
37. Iris M, Otani, James Kuhlen Jr, Kimberly Blumenthal, Autumn Guyer AB. A role for vancomycin epicutaneous skin testing in the evaluation of perioperative anaphylaxis. *J Allergy Clin Immunol Pract*. 2015.
38. Bosse D, Lemire C, Ruel J, Cantin AM, Valiquette L, Me F. Severe anaphylaxis caused by orally administered vancomycin to a patient with *Clostridium difficile* infection. *Infection*. 2013;41(2):579-582. doi:10.1007/s15010-012-0328-4.
39. Kupstaite, Ruta, Kaduševi E. Severe vancomycin-induced anaphylactic reaction. 2010;46(1):30-33.
40. Kitazawa T, Ota Y, Kada N, Morisawa Y, Yoshida A. Successful Vancomycin Desensitization with a Combination. 2005;(February 1998):317-321. doi:10.2169/internalmedicine.45.1388.
41. Hesham Hassaballa, Naveed Mallick JO. Vancomycin Anaphylaxis in a Patient with Vancomycin-induced red man syndrome. *Am J Ther*. 2000;7(319):320.
42. Chopra N, Oppenheimer J, Derimanov GS, Fine PL. Vancomycin anaphylaxis and successful desensitization in a patient with end stage renal disease on hemodialysis by maintaining steady antibiotic levels. *Ann Allergy, Asthma Immunol*. 2000;84(6):633-635. doi:10.1016/S1081-1206(10)62416-7.
43. Alan Villavicencio, Lloyd Hey, Dhavalkumar Patel PB. Acute cardiac and pulmonary arrest after infusion of vancomycin with subsequent desensitization. *J Allergy Clin Immunol*. 1998;100(6):853-854.

44. Htike NL, Santoro J, Gilbert B, Elfenbein IB, Teehan G. Biopsy-proven vancomycin-associated interstitial nephritis and acute tubular necrosis. *Clin Exp Nephrol*. 2012;16(2):320-324. doi:10.1007/s10157-011-0559-1.
45. Salazar, M, Matthews M EM, C G. Biopsy Proven Interstitial Nephritis Following Treatment with Vancomycin: A Case Report. *Conn Med*. 2010;74(3):139-142.
46. Michail S1, Vaiopoulos G, Nakopoulou L, Revenas C, Aroni K, Karam P, Stathakis C TT. Henoch-Schoenlein purpura and acute interstitial nephritis after intravenous vancomycin administration in a patient with a staphylococcal infection. *Scand J Rheumatol*. 1998;27(3):233-235.
47. Hong S, Valderrama E, Mattana J, et al. Vancomycin-Induced Acute Granulomatous Interstitial Nephritis: Therapeutic Options. *Am J Med Sci*. 2007;334(4):296-300. doi:10.1097/MAJ.0b013e3180a6ec1e.
48. Hsu SI, Ph D. Biopsy-Proved Acute Tubulointerstitial Nephritis and. *Pharmacology*. 200AD.
49. Wai AO, Lo AMS, Abdo A, Marra F. Vancomycin-Induced Acute Interstitial Nephritis. 1998;32:1160-1164.
50. Codding CE1, Ramseyer L, Allon M, Pitha J RM. Tubulointerstitial nephritis due to vancomycin. *Am J Kidney Dis*. 1989;14(6):512-515.
51. Bergman M, Glew R ET. Acute Interstitial Nephritis Associated With Vancomycin. 1988;148:7-8.
52. Changela A, Javaiya H, Rickenback K, Elnawawi A, Changela K. Toxic epidermal necrolysis after vancomycin use: a case report and discussion of management. *Am J Ther*. 2013;20(2):223-225. doi:10.1097/MJT.0b013e3181f94c27.
53. O'Brien M, Shah A AH. A pentad of vancomycin reactions. *Skinmed*. 2011;9(4):225-229.
54. Bouaziz JD, Valeyrie-Allanore L, Damak H, Faure H, Marinho E RB. Toxic epidermal necrolysis after vancomycin in a patient with terminal renal insufficiency: interest for intensive haemodialysis? *J Eur Acad Dermatology Venereol*. 2006;20(8):1011-1013.
55. K. C-T. Toxic epidermal necrolysis secondary to vancomycin. *Mo Med*. 2000;97(4):131-132.
56. Alexander MD. PA Greenberc er M. Vancomycin-Induced Stevens-Johnson Syndrome. *J Allergy Clin Immunol*. 1996;97(1):641.
57. Vidal C1, González Quintela A FR. Toxic epidermal necrolysis due to vancomycin. *Ann Allergy*. 1992;68(4):345-347.
